# Supplementary material for: Genetic background and development stage of maize influence disease severity and yield loss due to maize lethal necrosis (MLN) and Maize chlorotic mottle virus (MCMV)
Source: Research Square preprint supplement (doi:10.21203/rs.3.rs-1438522/v1), 2022-03-15
Supplement: Supplementary file 1 [file 4acd986d5e3dbaea803fd832.xlsx]

## Sheet: S table  5 ELISA mean MLN
Supplementary Table 5: Adjusted means and standard error for ELISA values for MCMV and SCMV recorded on test entries.
Adjusted mean			V5	V5	V5	V5		V5		V5		V5	V5	V10		V10		V10		V10		V10		V10	V10	V14	V14		V14	V14	V14	V14	V14	VT	VT	VT	VT	VT	R1	R1	R1		R1	R1
Virus	Genotype	Type	V10	V14	VT	R1		SC		SW		GOT1	GOT2	V14		VT		R1		SC		SW		GOT1	GOT2	VT	R1		R2	SC	SW	GOT1	GOT2	R2	SC	SW	GOT1	GOT2	R3	SC	SW		GOT1	GOT2
MCMV	Hybrid	Resistant	2.4541	3.6162	3.4911	3.4772		1.3358		1.3841		0.1086	0.128	3.084		2.7206		2.3243		1.1857		1.1854		0.09403	0.0991	0.3445	0.5495		1.3137	1.5703	1.2532	0.1077	0.1006	1.0774	1.1991	1.3293	0.09192	0.1142	0.5832	1.0609	1.0804		0.1091	0.1255
MCMV	Hybrid	Tolerant	2.5411	3.5692	3.2745	3.2477		1.3769		1.2408		0.1129	0.1354	3.4636		2.7904		2.3842		1.3196		1.1676		0.09155	0.1115	0.5819	0.8324		1.5725	1.4769	1.201	0.09686	0.09326	1.3017	1.1964	1.1629	0.1079	0.1031	0.5567	0.8917	0.7033		0.1208	0.102
MCMV	Hybrid	Susceptible	3.1365	3.6291	3.2034	3.4667		1.1652		1.2474		0.1127	0.1236	3.3117		3.2768		2.2373		1.2872		1.1618		0.09383	0.09648	0.7004	0.9915		1.4412	1.5726	1.1797	0.1025	0.09753	1.0799	1.2527	1.2626	0.1037	0.1191	0.5873	1.5173	1.1391		0.1077	0.09412
MCMV	Inbred line	Resistant	4.0529	4.4462	2.7784	3.7607	a	1.494	a	0.9456	a	0.08217	0.09638	3.2784	a	2.8234	a	2.7905	a	2.2531	a	1.4192	a	0.09149	0.09508	0.6003	0.9804	a	2.2006	2.3337	1.1081	0.08161	0.08221	0.89	2.0808	0.9933	0.08333	0.08413	0.7565	1.2097	0.7222	a	0.08265	0.08706
MCMV	Inbred line	Tolerant	4.449	4.3768	2.8542	3.9123	a	1.0267	b	0.8411	a	0.08046	0.1021	3.3901	a	3.3529	a	2.8525	a	2.0575	a	1.3005	a	0.09283	0.09917	0.5761	1.4127	a	2.796	2.0057	1.4014	0.07935	0.08675	1.2246	2.1121	1.0369	0.08282	0.09121	1.3291	1.643	1.1932	b	0.08036	0.08176
MCMV	Inbred line	Susceptible	4.6603	3.6752	2.723	2.1043	b	0.9488	b	0.5911	b	0.0785	0.09742	1.6508	b	1.1149	b	1.0451	b	0.08523	b	0.06704	b	0.09389	0.09683	1.4161	2.5121	b	2.4434	1.6101	1.1318	0.09882	0.08198	2.4652	1.9866	1.1005	0.0924	0.08543	2.3574	1.2196	0.9498	ab	0.07931	0.08098
SCMV	Hybrid	Resistant	0.1199	1.4669	0.5607	0.5377		0.1853		0.084		0.1113	0.114	0.3799		0.326		0.3748		0.1633		0.08284		0.09921	0.09653	0.0906	0.08991		0.08401	0.1068	0.08588	0.07407	0.0775	0.1014	0.124	0.08945	0.08998	0.09768	0.07714	0.1026	0.08556		0.09212	0.08299
SCMV	Hybrid	Tolerant	0.8873	1.5983	1.1858	0.7108		0.2857		0.08137		0.11	0.113	1.2298		1.1739		0.6169		0.1513		0.08391		0.09432	0.1247	0.09122	0.09451		0.08681	0.1085	0.08953	0.07328	0.0775	0.1054	0.1174	0.08774	0.08667	0.09796	0.07649	0.1045	0.08212		0.08689	0.08511
SCMV	Hybrid	Susceptible	1.0538	1.4587	1.2045	0.6225		0.1462		0.09172		0.1117	0.1156	1.3595		1.0408		0.4451		0.1352		0.08118		0.09676	0.09468	0.08812	0.09367		0.07784	0.107	0.07689	0.07152	0.0747	0.09998	0.1164	0.09233	0.08897	0.1063	0.07312	0.1214	0.08805		0.0879	0.08664
SCMV	Inbred line	Resistant	1.1739	2.3244	0.1887	0.7385	a	0.08367		0.08111		0.0772	0.07108	0.9116		0.7696		0.5174		0.1316		0.09623		0.0734	0.07571	0.08198	0.07739		0.0737	0.3607	0.08295	0.07596	0.07352	0.07923	0.1198	0.08939	0.07329	0.07979	0.07276	0.09015	0.07927		0.07355	0.07517
SCMV	Inbred line	Tolerant	1.1536	2.2846	0.2941	1.0139	a	0.08661		0.07575		0.0789	0.07458	0.4634		0.615		0.4512		0.1125		0.08397		0.07486	0.07392	0.07866	0.07857		0.07446	0.4694	0.08777	0.07342	0.07114	0.07842	0.1132	0.08464	0.07319	0.07897	0.07708	0.07894	0.07951		0.07584	0.07485
SCMV	Inbred line	Susceptible	1.9294	1.9282	0.2229	0.4353	b	0.09067		0.07753		0.07421	0.07056	0.7601		0.3888		0.2188		0.06352		0.07219		0.0751	0.07333	0.1045	0.0793		0.0855	0.4032	0.08564	0.07248	0.07257	0.0795	0.1082	0.08523	0.07359	0.08096	0.07626	0.09192	0.08325		0.07591	0.07483
Standard Error			V5	V5	V5	V5		V5		V5		V5	V5	V10		V10		V10		V10		V10		V10	V10	V14	V14		V14	V14	V14	V14	V14	VT	VT	VT	VT	VT	R1	R1	R1		R1	R1
Virus	Genotype	Type	V10	V14	VT	R1		SC		SW		GOT1	GOT2	V14		VT		R1		SC		SW		GOT1	GOT2	VT	R1		R2	SC	SW	GOT1	GOT2	R2	SC	SW	GOT1	GOT2	R3	SC	SW		GOT1	GOT2
MCMV	Hybrid	Resistant	0.2076	0.07359	0.121	0.1407		0.09854		0.0996		0.003003	0.005582	0.1399		0.1951		0.1709		0.09664		0.09642		0.000949	0.005892	0.1111	0.1766		0.3426	0.1001	0.08129	0.008945	0.00953	0.1653	0.1936	0.08958	0.006205	0.01551	0.09582	0.1158	0.1028		0.005913	0.01032
MCMV	Hybrid	Tolerant	0.1961	0.06919	0.1152	0.133		0.09433		0.09679		0.002854	0.005257	0.1335		0.1867		0.1652		0.09285		0.09172		0.000912	0.005663	0.1073	0.1697		0.3398	0.09736	0.07855	0.00863	0.009268	0.1601	0.19	0.08503	0.005881	0.01496	0.09113	0.1096	0.09818		0.005597	0.009957
MCMV	Hybrid	Susceptible	0.1966	0.07009	0.1144	0.1337		0.09481		0.09743		0.002886	0.005355	0.1332		0.1855		0.1644		0.09232		0.09178		0.000913	0.005631	0.1075	0.1698		0.3403	0.09716	0.07817	0.008661	0.009292	0.1593	0.1898	0.08438	0.005835	0.01493	0.09039	0.1087	0.09813		0.005552	0.009926
MCMV	Inbred line	Resistant	0.08517	0.1399	0.3129	0.1635		0.06999		0.04191		0.002158	0.007218	0.169		0.141		0.1429		0.08944		0.05233		0.004157	0.00419	0.1197	0.1658		0.162	0.1783	0.103	0.006114	0.002522	0.1967	0.113	0.05733	0.004763	0.005264	0.1995	0.09831	0.05058		0.00611	0.003015
MCMV	Inbred line	Tolerant	0.08978	0.1451	0.3209	0.1685		0.07144		0.0431		0.002274	0.007539	0.1781		0.1486		0.1452		0.09233		0.05516		0.004369	0.004417	0.1262	0.1748		0.1734	0.1888	0.1087	0.006488	0.002702	0.2028	0.1122	0.06027	0.004907	0.005322	0.2103	0.1036	0.05331		0.006318	0.003178
MCMV	Inbred line	Susceptible	0.08517	0.1399	0.3128	0.1634		0.06993		0.04189		0.002158	0.007217	0.169		0.141		0.1423		0.0889		0.05233		0.004153	0.00419	0.1197	0.1658		0.1654	0.1793	0.1032	0.006168	0.002563	0.1979	0.1147	0.05737	0.004763	0.005321	0.2007	0.09937	0.05058		0.00611	0.003015
SCMV	Hybrid	Resistant	0.0615	0.07183	0.104	0.1044		0.06118		0.004203		0.003954	0.003012	0.1131		0.1525		0.1305		0.009464		0.002226		0.002077	0.01112	0.004003	0.002643		0.002857	0.005598	0.003419	0.00236	0.002372	0.00356	0.009082	0.005896	0.003384	0.008405	0.001579	0.02346	0.002548		0.003398	0.001804
SCMV	Hybrid	Tolerant	0.05831	0.0693	0.09925	0.09969		0.05723		0.004075		0.003766	0.002914	0.1083		0.1466		0.1248		0.009088		0.002123		0.001994	0.01069	0.003922	0.002549		0.002724	0.005349	0.003267	0.002267	0.002271	0.003397	0.008597	0.00561	0.003245	0.0081	0.001494	0.02331	0.002459		0.003217	0.001735
SCMV	Hybrid	Susceptible	0.05786	0.06894	0.09858	0.09902		0.05793		0.004099		0.003743	0.002906	0.1076		0.1457		0.1249		0.009035		0.002117		0.002008	0.01063	0.003919	0.002557		0.002713	0.005313	0.003246	0.002265	0.002256	0.003383	0.008528	0.005603	0.003225	0.008089	0.001482	0.02331	0.002446		0.003191	0.001728
SCMV	Inbred line	Resistant	0.1167	0.1406	0.03352	0.06461		0.005047		0.001743		0.001433	0.001079	0.0707		0.05375		0.05383		0.008734		0.003045		0.001033	0.001929	0.004073	0.001852		0.003595	0.103	0.003098	0.001771	0.000848	0.001905	0.007909	0.002898	0.000962	0.001133	0.002024	0.003134	0.00163		0.001053	0.001029
SCMV	Inbred line	Tolerant	0.1192	0.1442	0.03434	0.06811		0.00532		0.001799		0.001483	0.001137	0.07453		0.05666		0.05599		0.009207		0.00321		0.001089	0.002008	0.004301	0.001943		0.003789	0.1114	0.003299	0.00189	0.00091	0.001938	0.008011	0.002971	0.000996	0.001194	0.002134	0.003303	0.001718		0.001101	0.001084
SCMV	Inbred line	Susceptible	0.1167	0.1405	0.0335	0.06461		0.005047		0.001743		0.001433	0.001079	0.0707		0.05375		0.05362		0.008734		0.003045		0.001033	0.001922	0.004082	0.001852		0.003595	0.103	0.00314	0.001748	0.00087	0.001924	0.00799	0.0029	0.000966	0.001133	0.002024	0.003134	0.00163		0.001103	0.001029
Significant differences between means highlighted in green
Code	Description
V5	5th Leaf stage
V10	10th Leaf stage
V14	14th Leaf stage
VT	Tasseling stage
R1	Silks visible outside the husks
R2	kernels white on outside,
R3	Milking stage
SC	Seed crush
SW	Seed wash
GOT1	Grow out test 1st sampling
GOT2	Grow out test 2nd sampling
