# Supplementary material for: Genetic background and development stage of maize influence disease severity and yield loss due to maize lethal necrosis (MLN) and Maize chlorotic mottle virus (MCMV)
Source: Research Square preprint supplement (doi:10.21203/rs.3.rs-1438522/v1), 2022-03-15
Supplement: Supplementary file 2 [file 7b92650c6cc45a066514b95b.xlsx]

## Sheet: S table 4 ELISA MLN
Supplementary Table 4: P-values for type effect on OD Elisa by virus, genotype per inoculation and sampling stage under MLN inoculation.
Inoculation stage	Virus	Genotype	V10	V14	VT	R1	R2	R3	SC	SW	GOT1	GOT2
V5	MCMV	Hybrid	0.3287	0.7937	0.466	0.5405	---	---	0.5052	0.643	0.5749	0.4255
	MCMV	Inbred line	0.071	0.098	0.9567	0.0236	---	---	0.0459	0.0458	0.5804	0.8525
	SCMV	Hybrid	0.0835	0.4503	0.1786	0.608	---	---	0.4513	0.464	0.9392	0.7581
	SCMV	Inbred line	0.0622	0.2684	0.2554	0.0498	---	---	0.6735	0.2754	0.2572	0.2071
V10	MCMV	Hybrid	---	0.417	0.3641	0.7748	---	---	0.6353	0.9806	0.3554	0.3886
	MCMV	Inbred line	---	0.0298	0.0148	0.0184	---	---	0.0053	0.0049	0.9224	0.816
	SCMV	Hybrid	---	0.1306	0.1945	0.5248	---	---	0.3671	0.7026	0.4162	0.3559
	SCMV	Inbred line	---	0.0929	0.0731	0.1029	---	---	0.0585	0.0603	0.5578	0.7058
V14	MCMV	Hybrid	---	---	0.3054	0.4054	0.8779	---	0.7848	0.7625	0.7275	0.8656
	MCMV	Inbred line	---	---	0.0601	0.0424	0.2051	---	0.1898	0.2983	0.2439	0.4926
	SCMV	Hybrid	---	---	0.8611	0.4922	0.3576	---	0.9645	0.3044	0.77	0.6604
	SCMV	Inbred line	---	---	0.0785	0.7871	0.2309	---	0.7915	0.6067	0.4814	0.2894
VT	MCMV	Hybrid	---	---	---	---	0.5096	---	0.9732	0.5822	0.4557	0.7103
	MCMV	Inbred line	---	---	---	---	0.0529	---	0.7291	0.5305	0.4417	0.6263
	SCMV	Hybrid	---	---	---	---	0.6104	---	0.8357	0.8378	0.7674	0.6554
	SCMV	Inbred line	---	---	---	---	0.9123	---	0.6386	0.5575	0.956	0.5745
R1	MCMV	Hybrid	---	---	---	---	---	0.9648	0.2319	0.2515	0.4851	0.4029
	MCMV	Inbred line	---	---	---	---	---	0.0567	0.1408	0.0464	0.9279	0.4563
	SCMV	Hybrid	---	---	---	---	---	0.4417	0.8461	0.3984	0.6467	0.5584
	SCMV	Inbred line	---	---	---	---	---	0.4448	0.1755	0.3514	0.3085	0.968
